# Supplementary material for: Single Nano-Sized Metal–Organic Framework for Bio-Nanoarchitectonics with In Vivo Fluorescence Imaging and Chemo-Photodynamic Therapy
Source: MDPI journal article supplement (doi:10.3390/nano12020287), 2022-01-17
Supplement: s1 [file s1]

Supplementary Information

# Single Nano-Sized Metal–Organic Framework for Bio-Nanoarchitectonics with In Vivo Fluorescence Imaging and Chemo-Photodynamic Therapy

Yong-Mei Wang <sup>1</sup>, Ying Xu <sup>1</sup>, Xinxin Zhang <sup>1</sup>, Yifan Cui <sup>1</sup>, Qingquan Liang <sup>1</sup>, Cunshun Liu <sup>1</sup>, Xinan Wang <sup>1</sup>, Shuqi Wu <sup>2</sup> and Rusen Yang <sup>1,\*</sup>

<sup>1</sup> School of Advanced Materials and Nanotechnology, Academy of Advanced Interdisciplinary Research, Xidian University, Xi'an 710126, China; wangym1001@xidian.edu.cn (Y.-M.W.); 18141213000@stu.xidian.edu.cn (Y.X.); xxinzhang20@stu.xidian.edu.cn (X.Z.); 17170210019@stu.xidian.edu.cn (Y.C.); 21010540018@stu.xidian.edu.cn (Q.L.); 21141213493@stu.xidian.edu.cn (C.L.); wangxn@xidian.edu.cn (X.W.)

<sup>2</sup> School of Life Sciences, Northwest University of Technology, Xi'an 710072, China; sqwu@nwpu.edu.cn

\* Correspondence: rsyang@xidian.edu.cn

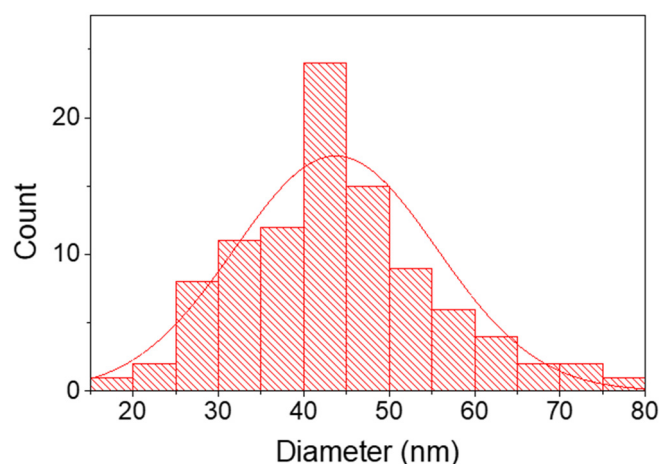

**Figure S1.** Size distribution obtained from SEM images of H<sub>2</sub>L-MOFs.

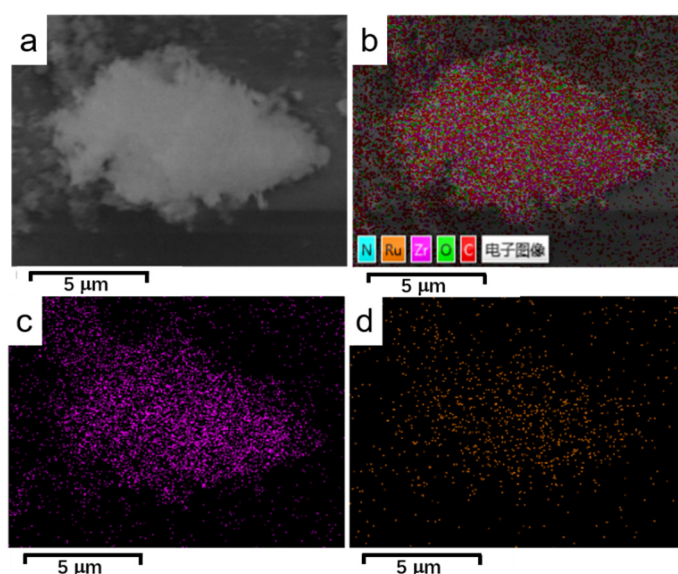

**Figure S2.** (a) SEM image and elemental mapping of (b) overlapped, (c) Zr, (d) Ru of the H<sub>2</sub>L-MOFs.

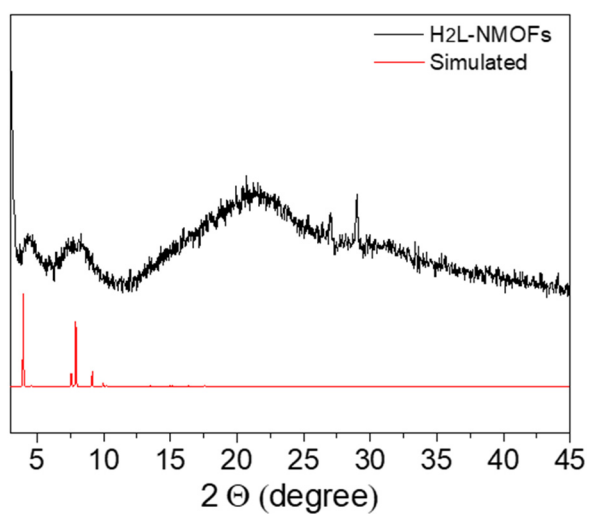

Figure S3. XRD of H<sub>2</sub>L-MOFs.

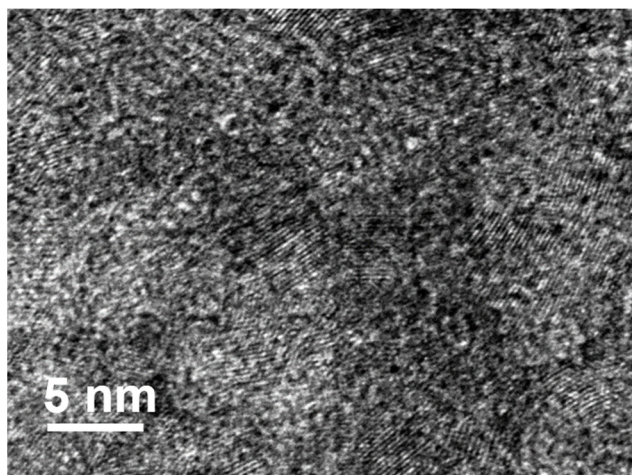

Figure S4. High Resolution Transmission Electron Microscope (HRTEM) image of H<sub>2</sub>L-MOFs nanoparticles.

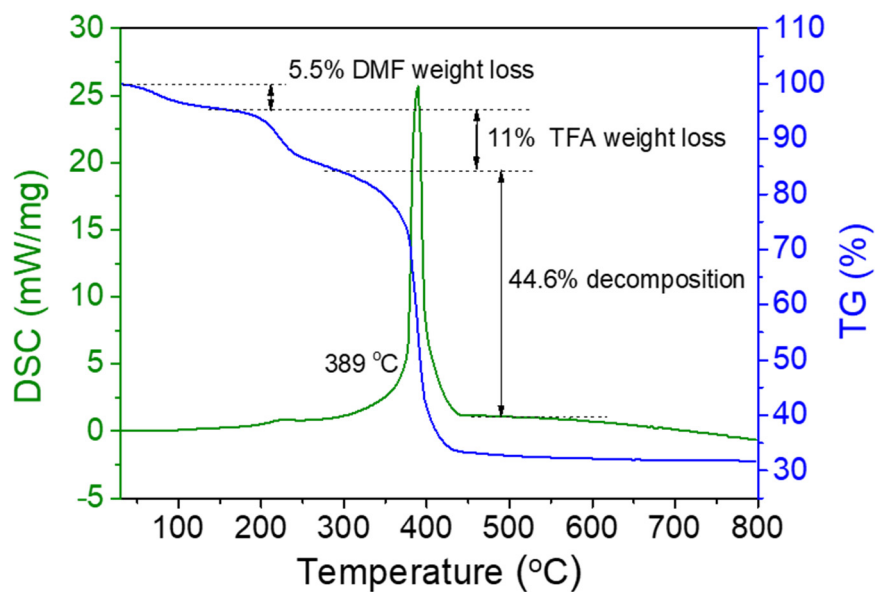

Figure S5. TGA plots of H<sub>2</sub>L-MOFs.

**Table S1.** Relative element content obtained by EDS.

| Element | Series   | Apparent concentration | k ratio | wt%    | wt% Sigma | Atomic percentage |
|---------|----------|------------------------|---------|--------|-----------|-------------------|
| C       | K-series | 30.54                  | 0.30541 | 57.19  | 1.08      | 68.37             |
| N       | K-series | 1.63                   | 0.00290 | 2.61   | 1.49      | 2.67              |
| O       | K-series | 17.47                  | 0.05878 | 30.59  | 0.77      | 27.46             |
| Zr      | L-series | 10.85                  | 0.10855 | 8.67   | 0.34      | 1.36              |
| Ru      | L-series | 1.07                   | 0.01071 | 0.94   | 0.16      | 0.13              |
| Total   |          |                        |         | 100.00 |           | 100.00            |

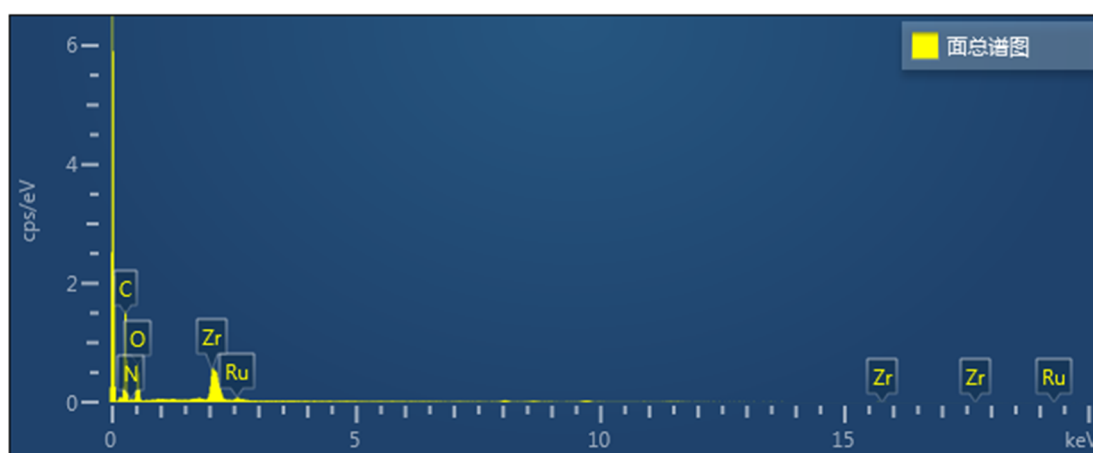**Figure S6.** EDS spectrum of H<sub>2</sub>L-MOFs.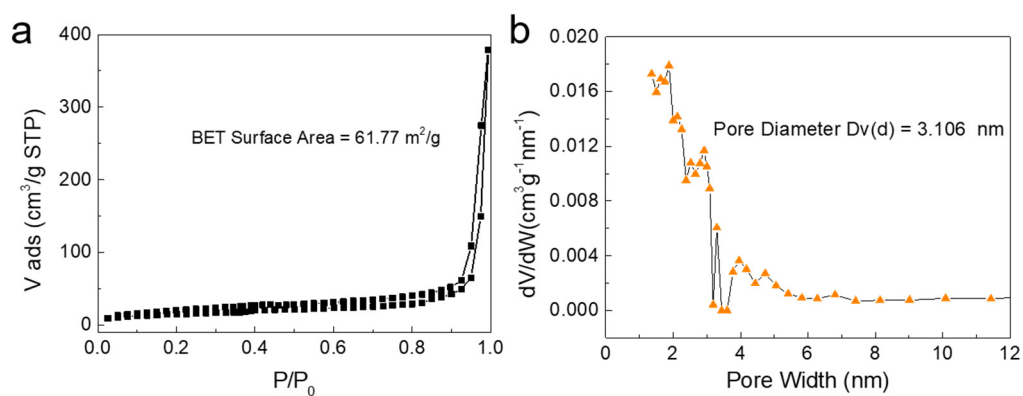**Figure S7.** N<sub>2</sub> adsorption isotherms for H<sub>2</sub>L-MOFs at 77 K. (a) N<sub>2</sub> adsorption isotherms and (b) DFT pore size distribution for H<sub>2</sub>L-MOFs using data measured with N<sub>2</sub> at 77 K.

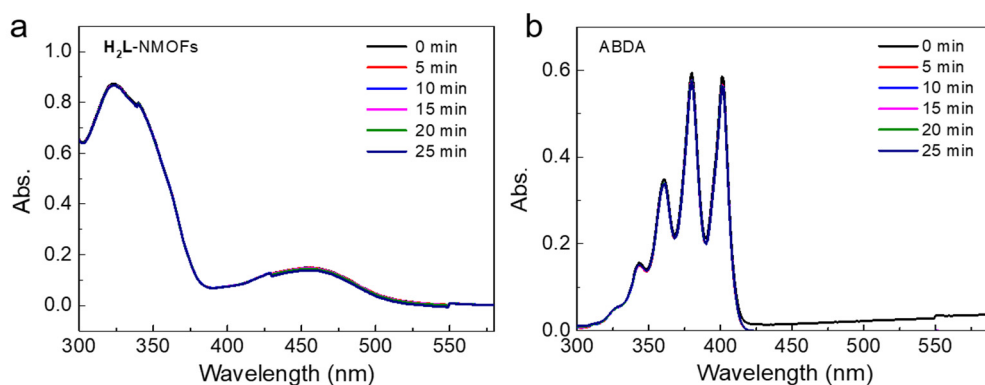

**Figure S8.** Control groups of (a) 200  $\mu\text{M}$  ABDA and (b) 80  $\mu\text{M}$  H<sub>2</sub>L-MOFs with the irradiation over a period of 25 min.

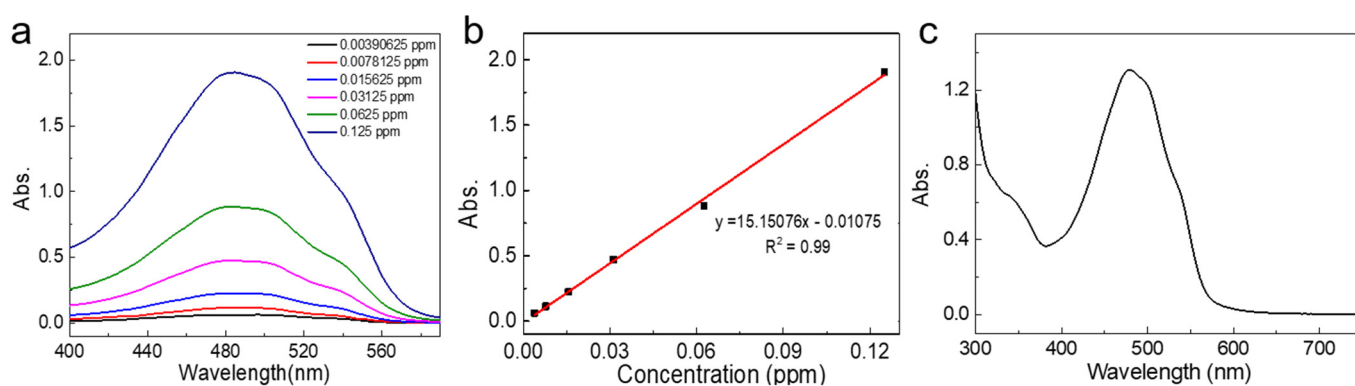

**Figure S9.** DOX adsorption of MOFs. (a) Absorbance of DOX with different concentrations. (b) Standard curve of DOX solution. (c) DOX absorbance spectrum of H<sub>2</sub>L-MOFs after 48 h DOX adsorption.

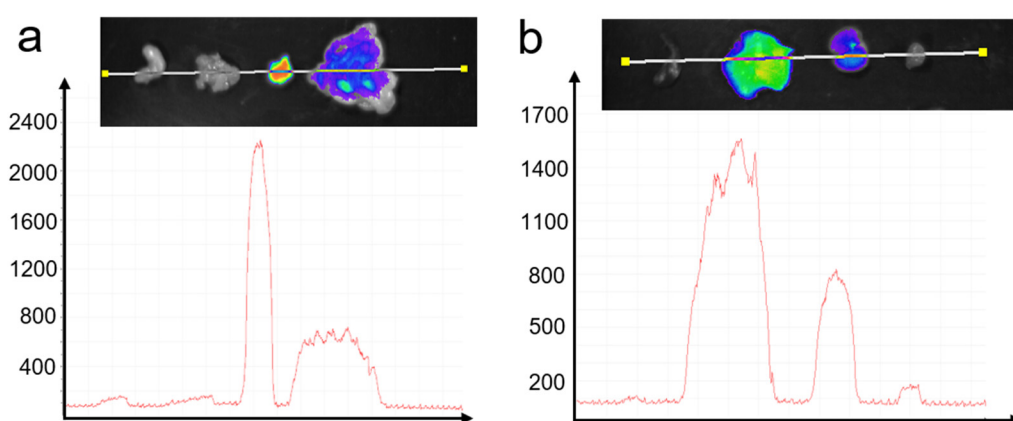

**Figure S10.** Fluorescence and intensity diagrams of various organs in nude mice bearing tumor. (a) stomach, lung, tumor, and intestine. (b) spleen, liver, kidney, and heart.
